# Supplementary material
Source: publisher figshare collection journal article supplement (https://tandf.figshare.com/ndownloader/files/16378004)
Supplement: Supplementary file 1 [file 16378004]

*Appendix A:* Supplemental Analyses

**Table A.1:** Regression analyses predicting seeing and posting news and political content on social media among users of a given platform

|  | See political content | | | Post political content | | |
| --- | --- | --- | --- | --- | --- | --- |
|  | Facebook | Twitter | YouTube | Facebook | Twitter | YouTube |
| Age | -.30*** | -.21*** | -.22*** | -.12** | -.11* | -.08* |
| Gender | .01 | -.01 | -.01 | -.05 | -.12* | -.06 |
| Education | .02 | -.01 | .04 | .04 | .07 | .11* |
| Income | .01 | .05 | -.07 | -.04 | -.06 | .10* |
| White | .02 | -.03 | -.03 | -.01 | .00 | -.04 |
| Party affiliation [Democrat] | .00 | -.08 | -.05 | .03 | .04 | -.02 |
| Partisan strength | -.00 | -.04 | -.10* | .02 | .01 | .04 |
| Ideology [liberal] | .03 | .05 | -.01 | -.08* | -.10+ | -.07 |
| Ideological extremity | .04 | .15* | .05 | .10** | .11* | .11** |
| Political/news interest | .20*** | .24** | .16** | .08* | .10+ | .06 |
| News trust | -.01 | .08 | .06 | .05 | -.01 | .08* |
| Conflict avoidance | -.12* | -.19** | -.33*** | -.17*** | -.16** | -.10* |
| Internal political efficacy | -.03 | -.08 | -.06 | .08+ | .02 | -.06 |
| Need for cognition | .03 | -.01 | -.01 | .03 | -.02 | -.01 |
| SPML | .06 | .08 | .07 | -.02 | -.02 | .06 |
| VML | .04 | .12+ | .00 | -.09* | -.12* | -.13** |
| News literacy | -.10* | -.03 | -.23** | -.18*** | -.21*** | -.25*** |
| *Adj R-squared* | *.175* | *.261* | *.311* | *.343* | *.384* | *.429* |
| See Facebook politics | ---- | ---- | ---- | .43*** | ---- | ---- |
| See Twitter politics | ---- | ---- | ---- | ---- | .42*** | ---- |
| See YouTube politics | ---- | ---- | ---- | ---- | ---- | .38*** |
| *Adj R-squared* |  |  |  | *.490* | *.514* | *.528* |
| N | 628 | 294 | 426 | 628 | 294 | 426 |

Standardized beta coefficients reported; + *p<*.10 **p<*.05, ***p*<.01*,*** p*<.001

**Table A.2:**Regression analyses predicting skepticism towards information on social media looking only at users of all three platforms (N=230)

|  | Social media  skepticism |
| --- | --- |
| Age | -.10 |
| Gender | .01 |
| Education | .01 |
| Income | -.00 |
| White | .02 |
| Party affiliation [Democrat] | .16* |
| Partisan strength | .05 |
| Ideology [liberal] | -.26** |
| Ideological extremity | .09 |
| Political/news interest | .21* |
| News trust | -.17* |
| Conflict avoidance | .12 |
| Internal political efficacy | -.08 |
| Need for cognition | .13+ |
| SPML | -.19* |
| VML | .27** |
| News literacy | .08 |
| *Adj R-squared* | *.128* |
| See Facebook politics | -.19* |
| See Twitter politics | .16+ |
| See YouTube politics | .04 |
| Post SNS politics | -.09 |
| *Adj R-squared* | *.139* |

Standardized beta coefficients reported; + *p<*.10 **p<*.05, ***p*<.01*,*** p*<.001

**Table A.3:** Regression analyses predicting seeing and posting news content on social media

|  | See news content | | | Post news content | | |
| --- | --- | --- | --- | --- | --- | --- |
|  | Facebook | Twitter | YouTube | Facebook | Twitter | YouTube |
| Age | -.31*** | -.28*** | -.31*** | -.06* | -.04 | -.02 |
| Gender | .05 | -.09** | -.06+ | -.05+ | -.08** | -.05+ |
| Education | .01 | .09* | .02 | .08** | .06* | .07* |
| Income | .00 | .03 | .01 | -.06* | -.01 | .05 |
| White | .02 | -.06 | -.06+ | -.01 | .00 | .00 |
| Party affiliation [Democrat] | -.00 | -.04 | .04 | .02 | .01 | .01 |
| Partisan strength | .02 | .06 | -.05 | .01 | .03 | .02 |
| Ideology [liberal] | .03 | -.00 | -.03 | -.07* | -.09** | -.10** |
| Ideological extremity | -.03 | .05 | -.01 | .09** | .05* | .08** |
| News interest | .18*** | .14*** | .12** | .04 | .05 | .05 |
| News trust | .00 | -.01 | .05 | .06* | .02 | .08** |
| Conflict avoidance | -.09* | -.13** | -.23*** | -.14*** | -.10** | -.10** |
| Internal political efficacy | -.02 | -.07 | -.07 | .07+ | -.05 | -.09* |
| Need for cognition | .09* | .04 | .05 | .00 | -.02 | .01 |
| SPML | -.02 | .08+ | .06 | .01 | .06+ | .07* |
| VML | -.01 | -.01 | .03 | -.07+ | -.07* | -.12*** |
| News literacy | -.09* | -.04 | -.11** | -.17*** | -.13*** | -.16*** |
| *Adj R-squared* | *.153* | *.196* | *.248* | *.257* | *.258* | *.283* |
| See Facebook politics | ---- | ---- | ---- | .53*** | ---- | ---- |
| See Twitter politics | ---- | ---- | ---- | ---- | .66*** | ---- |
| See YouTube politics | ---- | ---- | ---- | ---- | ---- | .55*** |
| *Adj R-squared* |  |  |  | *.496* | *.602* | *.508* |

Standardized beta coefficients reported; + *p<*.10 **p<*.05, ***p*<.01*,*** p*<.001

**Table A.4:** Regression analyses predicting seeing and posting political content on social media

|  | See political content | | | Post political content | | |
| --- | --- | --- | --- | --- | --- | --- |
|  | Facebook | Twitter | YouTube | Facebook | Twitter | YouTube |
| Age | -.25*** | -.28*** | -.33*** | -.11** | -.07* | -.05 |
| Gender | .06+ | -.08* | -.06+ | -.07* | -.08** | -.08** |
| Education | .02 | .07+ | .01 | .03 | .02 | .09** |
| Income | .02 | .03 | .01 | .01 | .01 | .11*** |
| White | .03 | -.05 | -.04 | -.01 | -.00 | -.01 |
| Party affiliation [Democrat] | -.03 | -.05 | .01 | .03 | .02 | .01 |
| Partisan strength | .01 | .04 | -.06+ | .05 | .03 | .04 |
| Ideology [liberal] | .07 | .02 | -.02 | -.07+ | -.06* | -.04 |
| Ideological extremity | .01 | .08* | .04 | .07* | .05+ | .04 |
| Political interest | .15** | .16*** | .14** | .06 | .02 | .02 |
| News trust | .02 | .02 | .07+ | .04 | .03 | .06* |
| Conflict avoidance | -.09* | -.10* | -.19*** | -.13*** | -.11** | -.06+ |
| Internal political efficacy | -.01 | -.11* | -.09+ | .07+ | .03 | .01 |
| Need for cognition | .02 | .02 | .02 | .05 | -.00 | .01 |
| SPML | .04 | .11* | .07 | -.04 | -.05 | -.01 |
| VML | .05 | .00 | .02 | -.07+ | -.04 | -.08* |
| News literacy | -.11** | -.03 | -.11** | -.15*** | -.13*** | -.19*** |
| *Adj R-squared* | *.119* | *.189* | *.236* | *.247* | *.242* | *.273* |
| See Facebook politics | ---- | ---- | ---- | .45*** | ---- | ---- |
| See Twitter politics | ---- | ---- | ---- | ---- | .62*** | ---- |
| See YouTube politics | ---- | ---- | ---- | ---- | ---- | .50*** |
| *Adj R-squared* |  |  |  | *.422* | *.551* | *.462* |

Standardized beta coefficients reported; + *p<*.10 **p<*.05, ***p*<.01*,*** p*<.001

**Table A.5:** Regression analyses predicting skepticism towards information on social media comparing news and political use separately

|  | Using news | Using politics |
| --- | --- | --- |
| Age | -.05 | -.03 |
| Gender | .03 | .02 |
| Education | .01 | .01 |
| Income | .04 | .04 |
| White | .05 | .05 |
| Party affiliation [Democrat] | .01 | .00 |
| Partisan strength | .01 | .01 |
| Ideology [liberal] | -.05 | -.05 |
| Ideological extremity | .02 | .02 |
| Political/news interest | .06 | .06 |
| News trust | -.17*** | -.16*** |
| Conflict avoidance | .07 | .08+ |
| Internal political efficacy | -.04 | -.05 |
| Need for cognition | .09* | .09* |
| SPML | -.09* | -.09+ |
| VML | .30*** | .30*** |
| News literacy | .09* | .09* |
| *Adj R-squared* | *.144* | *.143* |
| See Facebook news/politics | -.10* | -.05 |
| See Twitter news/politics | .03 | .02 |
| See YouTube news/politics | .02 | .03 |
| Post SNS news/politics | .03 | .01 |
| *Adj R-squared* | *.146* | *.141* |

Standardized beta coefficients reported; + *p<*.10 **p<*.05, ***p*<.01*,*** p*<.001

*Appendix B:* Question wording appendix

**Need for cognition (NFC)** [Strongly disagree, Disagree, Somewhat disagree, Neither agree nor disagree, Somewhat agree, Agree, Strongly agree]

- I prefer complex to simple problems
- Thinking a long time about something gives me little satisfaction [reversed]
- I prefer to do something that challenges my thinking abilities rather than something that requires little thought
- I try to avoid situations that require a lot of in-depth thinking about something

**Self-Perceived Media Literacy (SPML)** [Strongly disagree, Disagree, Somewhat disagree, Neither agree nor disagree, Somewhat agree, Agree, Strongly agree]

- I have the skills to interpret media messages
- I understand how news is made in the U.S.
- I am confident in my ability to judge the quality of news
- I’m often confused about the quality of news and information [reversed]

**Value for Media Literacy (VML)** [Strongly disagree, Disagree, Somewhat disagree, Neither agree nor disagree, Somewhat agree, Agree, Strongly agree]

- Media literacy is important to democracy
- People should understand how media companies make decision about news content
- People should accept information from the news on face value [reversed]
- It is the role of the press to represent diverse viewpoints
- The news media have a role to play in informing citizens about civic issues
- It is the job of citizens to overcome their biases when consuming news
- People need to critically engage with news content
- The main purpose of the news should be to entertain viewers [reversed]

**News Literacy** [response options in brackets, correct answers bolded]

- If you wanted to get a job as a news reporter in the US, you would need to get a license from: [The Federal Communications Commission, The Federal Trade Commission, The Society of Professional Journalists, **News reporters are not required to be licensed**]
- In 1983, around 50 companies owned most of the media outlets that Americans consumed. How many companies own most of the media we consume today? [100, 50, 25, **5**]
- When it comes to reporting the news, the main difference between a website like Google News and a website like CNN.com is that: [Google focuses on national news, while CNN focuses on local news, **Google does not have reporters who gather information, while CNN does,** Google has more editors than CNN does, Google charges more money for news than CNN does]
- Which of the following news outlets does not depend primarily on advertising for financial support? [CNN, The New York Times, Newsweek magazine, **PBS**]
- The number of racial/ethnic minorities portrayed as criminals in the news: [Accurately represents the proportion of minorities in the US population, Under-represents the proportion of minorities in the US population, **Over-represents the proportion of minorities in the US population**]
- Coverage of election campaigns in the news usually focuses on [**Who's winning,** In-depth analysis of where candidates stand on the issues, The candidates' educational background, The candidates' prior public service records]
- One common criticism of the news is that it is not objective. What do people who make this criticism typically mean by it? [The reporter only gives the facts of the story, The reporter's story relies too much on the opinions of people who are neutral, **The reporter puts his or her opinion in the story,** The reporter doesn't make the purpose of the story clear]
- People most often seek out news and information that: [**Aligns with their views of the world,** Differs from their views of the world, Requires effort to find, None of the above]
- Most people think negative messages in the media have: [A greater effect on themselves than other people, **A greater effect on other people than themselves,** The same effect on themselves as other people, Have no effect on anyone]
- People who watch a lot of television content often think the world is: [**More violent and dangerous than it actually is,** Less violent and dangerous than it actually is, Just as violent and dangerous as it actually is]

**Social media behaviors** [Never, Rarely, Occasionally, Fairly Often, Very Often]

- In the past week, how often did you see content about news or current events on each of the following social media sites?
- In the past week, how often did you see content about politics, political issues, or Donald Trump on each of the following social media sites?
- In the past week, how often did you post content about news or current events on each of the following social media sites?
- In the past week, how often did you post content about politics, political issues, or Donald Trump on each of the following social media sites?

**Social media skepticism** [Strongly disagree, Disagree, Somewhat disagree, Neither agree nor disagree, Somewhat agree, Agree, Strongly agree]

- Too often, credible news information is mixed up with misinformation on social media
- You can’t trust the news stories people share on social media

**Political and News Interest**

**Conflict avoidance** [Strongly disagree, Disagree, Somewhat disagree, Neither agree nor disagree, Somewhat agree, Agree, Strongly agree]

- I find political debate exciting [reversed]
- I enjoy challenging the opinions of others [reversed]

**Internal political efficacy** [Strongly disagree, Disagree, Somewhat disagree, Neither agree nor disagree, Somewhat agree, Agree, Strongly agree]

- Sometimes politics and government are so complicated a person like me can’t understand them [reversed]
- I consider myself to be well qualified to participate in politics
- I feel I have a pretty good understanding of the important political issues facing our country
- I think I am better informed about politics and government than most people

**News trust** [Strongly disagree, Disagree, Somewhat disagree, Neither agree nor disagree, Somewhat agree, Agree, Strongly agree]

- I don’t think the news media can be trusted [reversed]
- The news media get in the way of society solving its problems [reversed]
- I have confidence in the people running the institutions of the press
- I think the news media are accurate
